# Supplementary material for: Liquid chromatography with micelles in open-tube capillaries
Source: Royal Society of Chemistry journal article supplement (doi:10.1039/c8gc00409a), 2018-01-01
Supplement: c8gc00409a1.pdf [file c8gc00409a1.pdf]

## Liquid chromatography with micelles in open-tube capillaries

Joselito P. Quirino\* and Faustino M. Tarongoy Jr.

Australian Centre for Research on Separation Science (ACROSS), School of Natural Sciences-Chemistry,  
University of Tasmania, Australia 7001

\*correspondence to: jquirino@utas.edu.au

### This Electronic Supplementary Information (ESI) pdf file includes:

|                                                                                                                                                                                                                                                         |          |
|---------------------------------------------------------------------------------------------------------------------------------------------------------------------------------------------------------------------------------------------------------|----------|
| <b>Table S1.</b> Relative retention time ( $t_R/t_0$ ) of selected analytes in the proposed OT-LC. ....                                                                                                                                                 | (page 2) |
| <b>Table S2.</b> Analytical figures of merit for the OT-LC with CTAB of pesticides. ....                                                                                                                                                                | (page 3) |
| <b>Table S3.</b> Analytical figures of merit for the OT-LC with SDS of antioxidants. ....                                                                                                                                                               | (page 4) |
| <b>Figure S1.</b> (top) The plot of analyte's $k_{av}$ from 0.1-5 versus calculated $t_R$ . (bottom) Experimental verification of the trend of $t_R \rightarrow t_0$ as $\beta_{mc} \rightarrow \infty$ , using 25 $\mu\text{m}$ i.d. capillaries. .... | (page 5) |
| <b>Figure S2.</b> Sample enrichment of a tripeptide by varying the concentration [CTAB] from 0.5-20 mM (a), pH from 2-10 (b), concentration [NaCl] from 0-3 M (c) and MeOH% from 5-70% (d) in the mobile phase. ....                                    | (page 6) |
| <b>Figure S3.</b> Gradient reversed phase HPLC and OT-LC of paracetamol (peak 1) and mefenamic acid (peak 2) drug product. ....                                                                                                                         | (page 7) |

**Table S1. Relative retention time ( $t_R/t_0$ ) of selected analytes in the proposed OT-LC.**

| pseudophase            | CTAB      | SDS       |                                     | CTAB      | SDS       |
|------------------------|-----------|-----------|-------------------------------------|-----------|-----------|
|                        | $t_R/t_0$ | $t_R/t_0$ |                                     | $t_R/t_0$ | $t_R/t_0$ |
| <i>cations</i>         |           |           | <i>anions</i>                       |           |           |
| nicardipine            | 1.71      | -         | flufenamic acid                     | 2.51      | 1.11      |
| labetalol              | 1.63      | 1.39      | mefenamic acid                      | 2.30      | 1.06      |
| imipramine             | 1.57      | -         | 4-bromophenol                       | 1.96      | 1.50      |
| verapamil              | 1.54      | -         | fenbufen                            | 1.82      | -         |
| dibucaine              | 1.49      | -         | fenoprop                            | 1.79      | -         |
| propranolol            | 1.40      | -         | ibuprofen                           | 1.72      | -         |
| naphthylamine          | 1.26      | 1.51      | dichlorprop                         | 1.63      | -         |
| diphenhydramine        | 1.23      | -         | 4-vinylbenzene-sulfonic acid        | 1.63      | -         |
| alprenolol             | 1.17      | 2.84      | sulindac                            | 1.57      | -         |
| chlorpheniramine       | 1.14      | 2.73      | 4-nitrophenol                       | 1.56      | -         |
| 3-hydroxypyridine      | 1.06      | -         | furosemide                          | 1.31      | -         |
| pindolol               | 1.04      | 1.47      | chloramphenicol                     | 1.09      | 1.06      |
| nadolol                | 1.04      | 1.07      | 4-methoxyphenol                     | 1.08      | 1.04      |
| dibenzoquat            | -         | 4.02      |                                     |           |           |
| diquat                 | -         | 1.16      | <i>amphiphilic</i>                  |           |           |
| neostigmine            | -         | 1.04      | sulfaquinoxaline                    | 1.74      | 1.08      |
|                        |           |           | sulfamethizole                      | 1.60      | -         |
| <i>p</i> -nitroaniline | -         | 1.17      | sulfadimethoxine                    | 1.55      | -         |
| <i>p</i> -toluidine    | -         | 1.04      | sulfamethoxazole                    | 1.39      | -         |
| ranitidine             | -         | 1.03      | sulfamerazine                       | 1.12      | -         |
| <i>neutrals</i>        |           |           | <i>amino acids/peptides/protein</i> |           |           |
| chlorpyrifos           | 2.16      | -         | tyr-tyr-tyr                         | 1.74      | -         |
| biphenyl               | 1.70      | -         | ubiquitin                           | 1.44      | -         |
| acenaphthene           | 1.64      | -         | glu-val-phe                         | 1.43      | 1.02      |
| parathion              | 1.59      | 2.76      | tryptophan                          | 1.23      | -         |
| fenitrothion           | 1.52      | 2.13      | phenylalanine                       | 1.05      | -         |
| diazinon               | 1.46      | 1.66      | bradykinin                          | -         | 1.27      |
| prednisolone           | 1.40      | 1.08      |                                     |           |           |
| hydrocortisone         | 1.33      | 1.11      |                                     |           |           |
| azinphos-methyl        | 1.32      | 2.06      |                                     |           |           |

Mobile phase was 1 mM CTAB or 1 mM SDS in 100 mM ammonium bicarbonate pH 8.5. Capillary was 50  $\mu$ m i.d. and was unmodified (CTAB) or modified (SDS) with a cationic polyelectrolyte poly(diallyldimethylammonium chloride). Injection length was 2 mm. Separation was by pressure at a flow rate of 10 cm/min. Detection was at 200 nm. More analytes were retained with CTAB as pseudophase.

**Table S2.** Analytical figures of merit for the OT-LC with CTAB of pesticides.

|                                                         | analyte   |           |            |              |           |
|---------------------------------------------------------|-----------|-----------|------------|--------------|-----------|
|                                                         | atrazine  | diuron    | diazinon   | fenitrothion | parathion |
| Linearity                                               |           |           |            |              |           |
| concentration range,<br>$\times 10^{-4}$ M              | 1.2 – 9.3 | 1.1 – 8.6 | 1.5 – 12   | 1.8 – 14     | 2.1 – 17  |
| equation of line ( $y = mx+b$ )                         |           |           |            |              |           |
| slope (m)                                               | 14.42     | 19.31     | 1.41       | 1.30         | 0.50      |
| y-intercept (b)                                         | + 99.28   | + 9.24    | + 43.76    | + 73.61      | + 66.02   |
| coefficient of<br>variation ( $R^2$ )                   | 0.996     | 0.998     | 0.996      | 0.998        | 0.999     |
| limit of detection<br>( $S/N = 3$ ), $\times 10^{-4}$ M | 0.06      | 0.07      | 1.30       | 0.89         | 1.30      |
| Repeatability, RSD (%)                                  |           |           |            |              |           |
| retention time                                          |           |           |            |              |           |
| intraday (n=3) <sup>1</sup>                             | 0.2 – 0.7 | 0.1 – 1.1 | 0.05 – 0.8 | 0.2 – 0.9    | 0.3 – 2.0 |
| interday (n=15) <sup>2</sup>                            | 0.8       | 1.2       | 2.8        | 3.2          | 3.0       |
| peak area                                               |           |           |            |              |           |
| intraday (n=3) <sup>1</sup>                             | 2.8 – 5.5 | 1.0 – 5.5 | 0.2 – 4.2  | 1.6 – 4.4    | 0.4 – 6.0 |
| interday (n=15) <sup>2</sup>                            | 5.6       | 5.4       | 4.5        | 4.9          | 7.6       |

<sup>1</sup>RSD% range taken within 5 days with three replicates (n=3) per day.<sup>2</sup>Taken from 15 pooled peak areas (n=15) within 5 days.

**Table S3.** Analytical figures of merit for the OT-LC with SDS of antioxidants.

|                                                         | analyte        |                                  |                                     |                                  |           |
|---------------------------------------------------------|----------------|----------------------------------|-------------------------------------|----------------------------------|-----------|
|                                                         | propyl gallate | butylated<br>hydroxy-<br>toluene | <i>tert</i> -butyl-<br>hydroquinone | butylated<br>hydroxy-<br>anisole | parathion |
| <b>Linearity</b>                                        |                |                                  |                                     |                                  |           |
| concentration range,<br>$\times 10^{-4}$ M              | 1.1 – 8.8      | 1.4 – 11                         | 2.3 – 18                            | 1.7 – 14                         | 1.4 – 12  |
| equation of line ( $y = mx+b$ )                         |                |                                  |                                     |                                  |           |
| slope (m)                                               | 14.6           | 7.65                             | 4.25                                | 5.71                             | 1.49      |
| y-intercept (b)                                         | + 241.49       | - 19.44                          | - 56.83                             | - 26.23                          | - 3.36    |
| coefficient of<br>variation ( $R^2$ )                   | 0.996          | 1.000                            | 0.998                               | 0.992                            | 0.996     |
| limit of detection<br>( $S/N = 3$ ), $\times 10^{-4}$ M | 0.12           | 0.31                             | 1.20                                | 0.77                             | 0.58      |
| <b>Repeatability, RSD (%)</b>                           |                |                                  |                                     |                                  |           |
| retention time                                          |                |                                  |                                     |                                  |           |
| intraday (n=3) <sup>1</sup>                             | 0.1 – 2.0      | 0.2 – 2.1                        | 0.2 – 1.2                           | 0.2 – 3.1                        | 0.3 – 1.9 |
| interday (n=15) <sup>2</sup>                            | 0.7            | 0.9                              | 1.1                                 | 2.8                              | 2.8       |
| peak area                                               |                |                                  |                                     |                                  |           |
| intraday (n=3) <sup>1</sup>                             | 1.0 – 8.4      | 1.9 – 5.6                        | 1.0 – 7.3                           | 0.4 – 3.4                        | 0.8 – 9.2 |
| interday (n=15) <sup>2</sup>                            | 5.5            | 4.7                              | 11.6                                | 5.2                              | 10.1      |

<sup>1</sup>RSD% range taken within 5 days with three replicates (n=3) per day.120<sup>2</sup>Taken from 15 pooled peak areas (n=15) within 5 days.

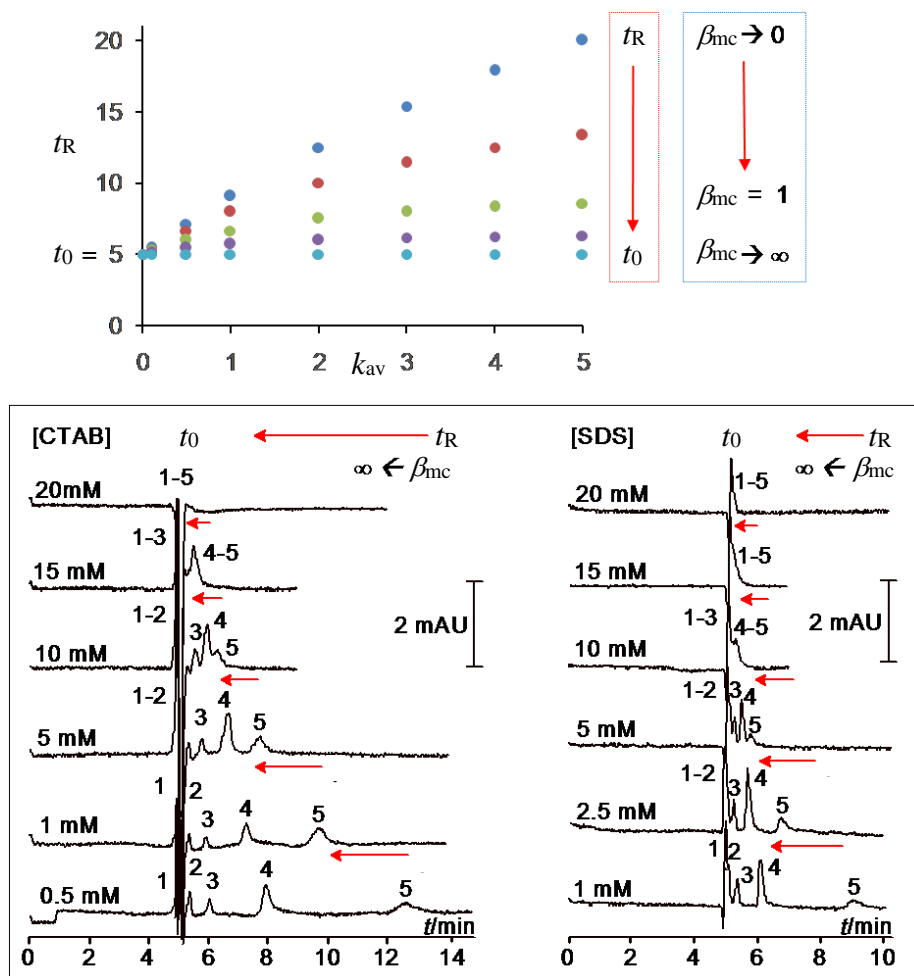

**Figure S1.** (top) The plot of analyte's  $k_{av}$  from 0.1-5 versus calculated  $t_R$ . The  $t_R = t_0$  if the analyte was not retained or solubilised into the interfacial micelles. The increase in the micellar phase ratio or  $\beta_{mc} \rightarrow \infty$  caused the  $t_R \rightarrow t_0$ . At  $\beta_{mc} = 1$ , the micelle solubilised analytes were equally distributed to the interfacial and solution micelles. (bottom) Experimental verification of the trend of  $t_R \rightarrow t_0$  as  $\beta_{mc} \rightarrow \infty$ , using 25  $\mu\text{m}$  i.d. capillaries. The  $\beta_{mc} \rightarrow \infty$  when the CTAB concentration [CTAB] or SDS concentration [SDS] in 100 mM ammonium bicarbonate pH 8.5 as mobile phase was increased from 0.5 mM CTAB or 1 mM SDS to 20 mM. The analytes were acetophenone (peak 1), propiophenone (peak 2), butyrophenone (peak 3), valerophenone (peak 4) and hexanophenone (peak 5), in the order of increasing hydrophobicity or  $k_{av}$ . The analyte concentrations were 0.4-1.1 mM and injected sample plug was 2 mm. The mobile phases were flowed at a rate of 10 cm/min (180 mbar).

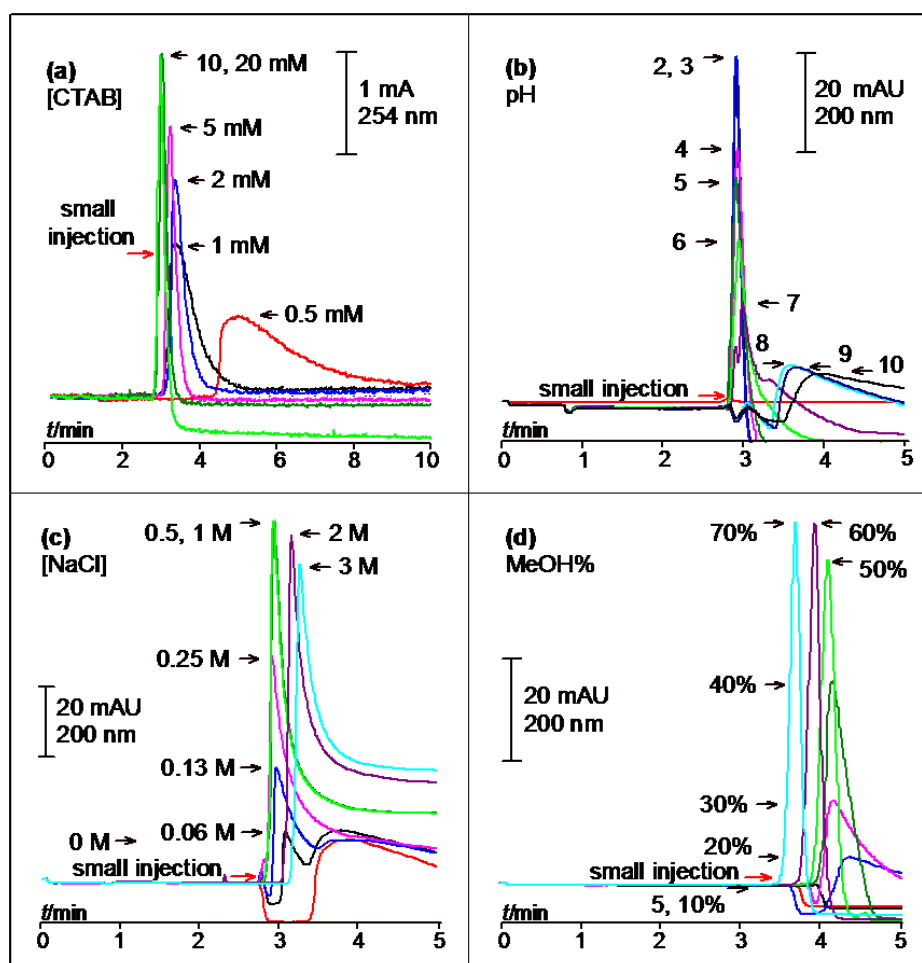

**Figure S2.** Sample enrichment of a tripeptide by varying the [CTAB] from 0.5-20 mM (a), pH from 2-10 (b), [NaCl] from 0-3 M (c) and MeOH% from 5-70% (d) in the mobile phase. For sample enrichment (black arrows), 0.06 mM tyr-tyr-tyr in 0.5 mM CTAB and 100 mM ammonium bicarbonate pH 8.5 buffer (sample matrix) was loaded at a length of 33.4 cm. The 50  $\mu$ m i.d. capillary (60 cm total length) was conditioned with the sample matrix. For small injection (red arrows), 0.06 (b-d) or 2 (a) mM tyr-tyr-tyr in buffer was injected at a length of 2 mm. The capillary was conditioned with buffer. Mobilisation with the mobile phase (sample enrichment) or buffer (small injection) was at a flow rate of 16.7 cm/min. 100 mM ammonium bicarbonate pH 8.5 was also the buffer in (a), (c), and (d) and phosphate solutions at different pH values were buffers in (b). Enrichment with NaCl (*i.e.*,  $\geq 0.5$  M NaCl in 100 mM ammonium bicarbonate pH 8.5 buffer), although still effective, was the weakest and gave a broad concentrated peak compared to the sharp peaks obtained with the other mobile phases. The increase in the amount of solution micelles due to the lowering of the cmc by the addition of salt was not as straightforward as when the surfactant was added into the mobile phase. The  $\beta_{mc}$  of 0.5 mM CTAB in 0.5 M NaCl and buffer was considered comparable to that of 2 mM CTAB in buffer, based on the observed peak widths.

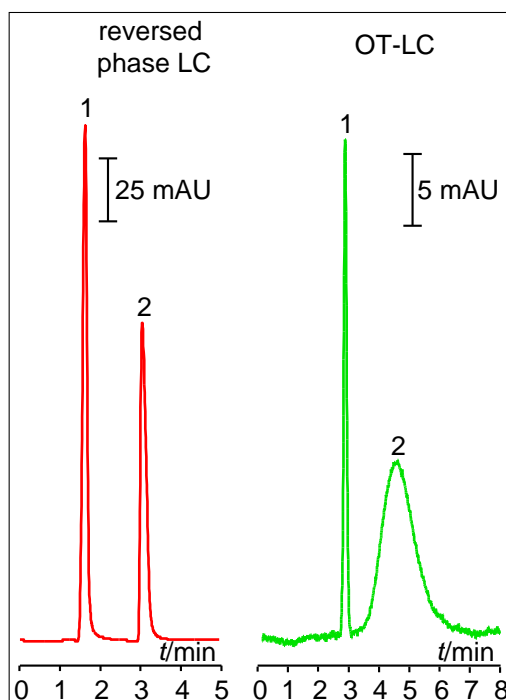

**Figure S3.** Gradient reversed phase LC and OT-LC of paracetamol (peak 1) and mefenamic acid (peak 2) drug product. Detection was at 260 nm. A 20  $\mu$ L aliquot of 30  $\mu$ g/mL of each drug in initial mobile phase composition was injected in reversed phase LC. LC mobile phase (initial and gradient) conditions are stated in the text. A 2 mm plug of sample (100  $\mu$ g/mL each drug) prepared in mobile phase was pressure injected in OT-LC. Mobile phase was 1.5 mM CTAB in 50 mM sodium phosphate pH 7.5 in OT-LC. The capillary was 50  $\mu$ m i.d. and 60 cm total length. More explanation in the text.
